# Supplementary material for: Feasible organic films using noninterfering emitters for sensitive and spatial high-temperature sensing
Source: Royal Society of Chemistry journal article supplement (doi:10.1039/c8tc02591f), 2018-01-01
Supplement: c8tc02591f1.pdf [file c8tc02591f1.pdf]

## ***Supporting Information***

### **Feasible organic films using noninterfering emitters for sensitive and spatial high-temperature sensing**

Qiyun Fang,<sup>a</sup> Ying Li,<sup>a</sup> Yingnan Wang,<sup>a</sup> Feng Yao,<sup>a</sup> Shuangqing Wang,<sup>b</sup> Yan Qian,<sup>\*a</sup> Guoqiang Yang<sup>\*b</sup> and Wei Huang<sup>\*ac</sup>

*<sup>a</sup>Key Laboratory for Organic Electronics and Information Displays & Jiangsu Key Laboratory for Biosensors, Institute of Advanced Materials (IAM), Jiangsu National Synergetic Innovation Center for Advanced Materials (SICAM), Nanjing University of Posts & Telecommunications (NUPT), 9 Wenyuan Road, Nanjing 210023, China E-mail: iamyqian@njupt.edu.cn*

*<sup>b</sup>Key laboratory of Photochemistry and Key Laboratory of Organic Solids, Institute of Chemistry, University of Chinese Academy of Sciences, Chinese Academy of Sciences, Beijing 100190 China. E-mail: gqyang@iccas.ac.cn*

*<sup>c</sup>Key Laboratory of Flexible Electronics (KLOFE) & Institute of Advanced Materials (IAM), Jiangsu National Synergetic Innovation Center for Advanced Materials (SICAM), Nanjing Tech University (Nanjing Tech), Nanjing 211816, China. E-mail: iamwhuang@njtech.edu.cn*

## 1. Excitation spectra of C2 and C3 films

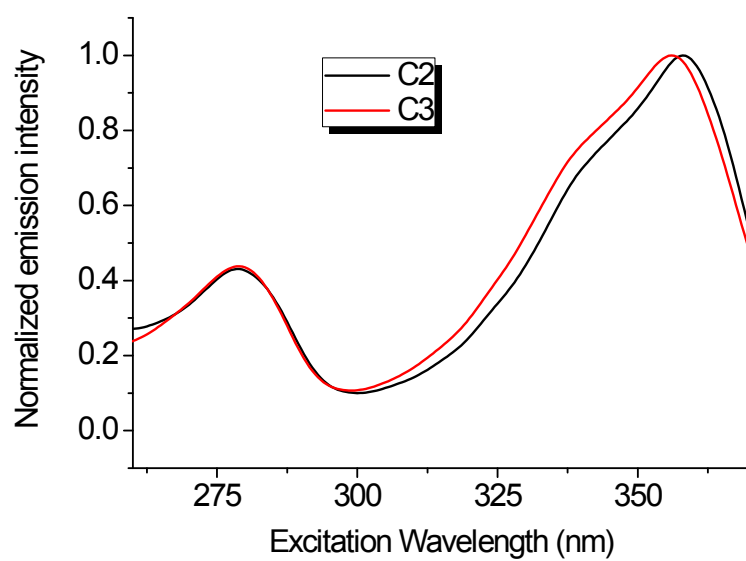

**Figure S1.** Normalized excitation spectra of C2 and C3 films (detected at 400 nm).

## 2. PL decay and fitting data of C2 and C3 films

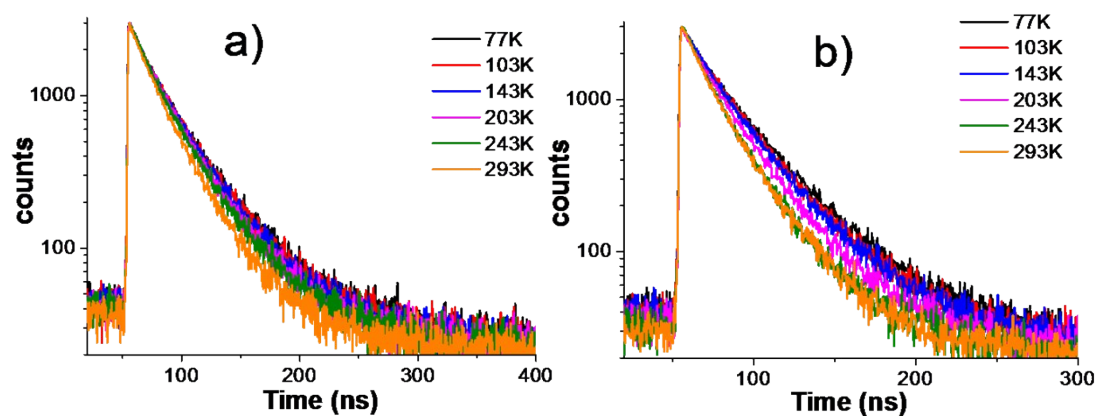

**Figure S2.** PL decay spectra of C2 (a) and C3 (b) films detected at 390 nm with the temperature changed from 77 to 293K.

### 3. Temperature-dependent Fluorescence spectra of blue and yellow dyes

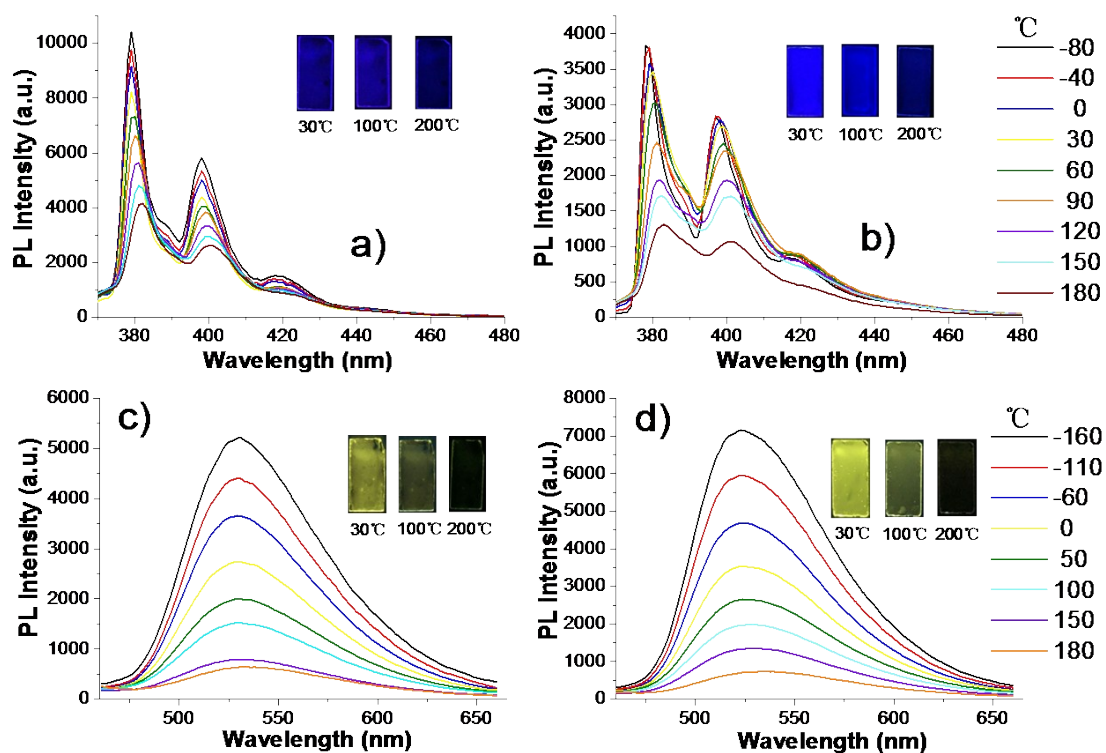

**Figure S3.** Fluorescence spectra of C2 (a), C3 (b), HBTPy (c) and HBTPhe (d) at various temperatures (inset: fluorescence photograph of the film at 30, 100 and 200 °C, respectively).

#### 4. Excitation spectra of hybrid and isolated films

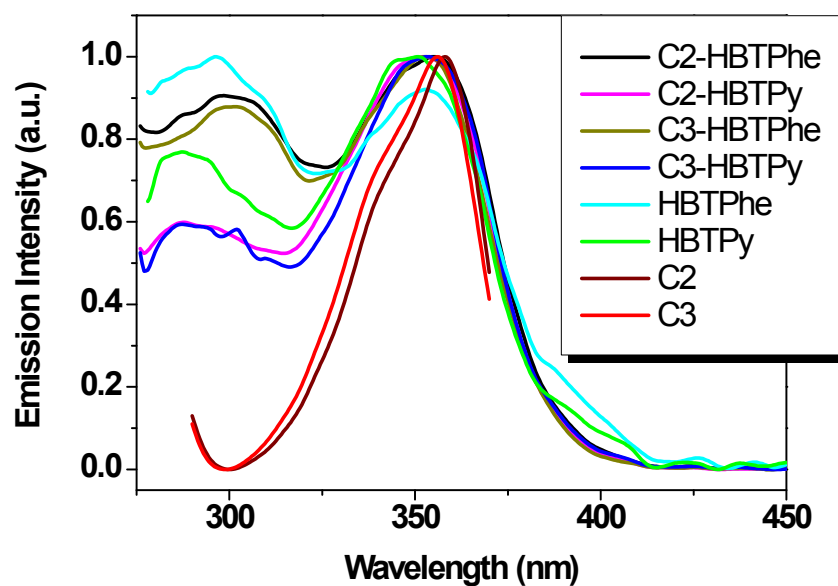

Figure S4. Emission spectra of C2-HBTPhe, C2-HBTPy, C3-HBTPhe, C3-HBTPy films (detected at 520 nm) have been compared with those of the yellow emitters of HBTPhe, HBTPy films (detected at 520 nm) and blue emitter of C2 and C3 films (detected at 400 nm).

## 5. Temperature-dependent emission spectra of the hybrid films

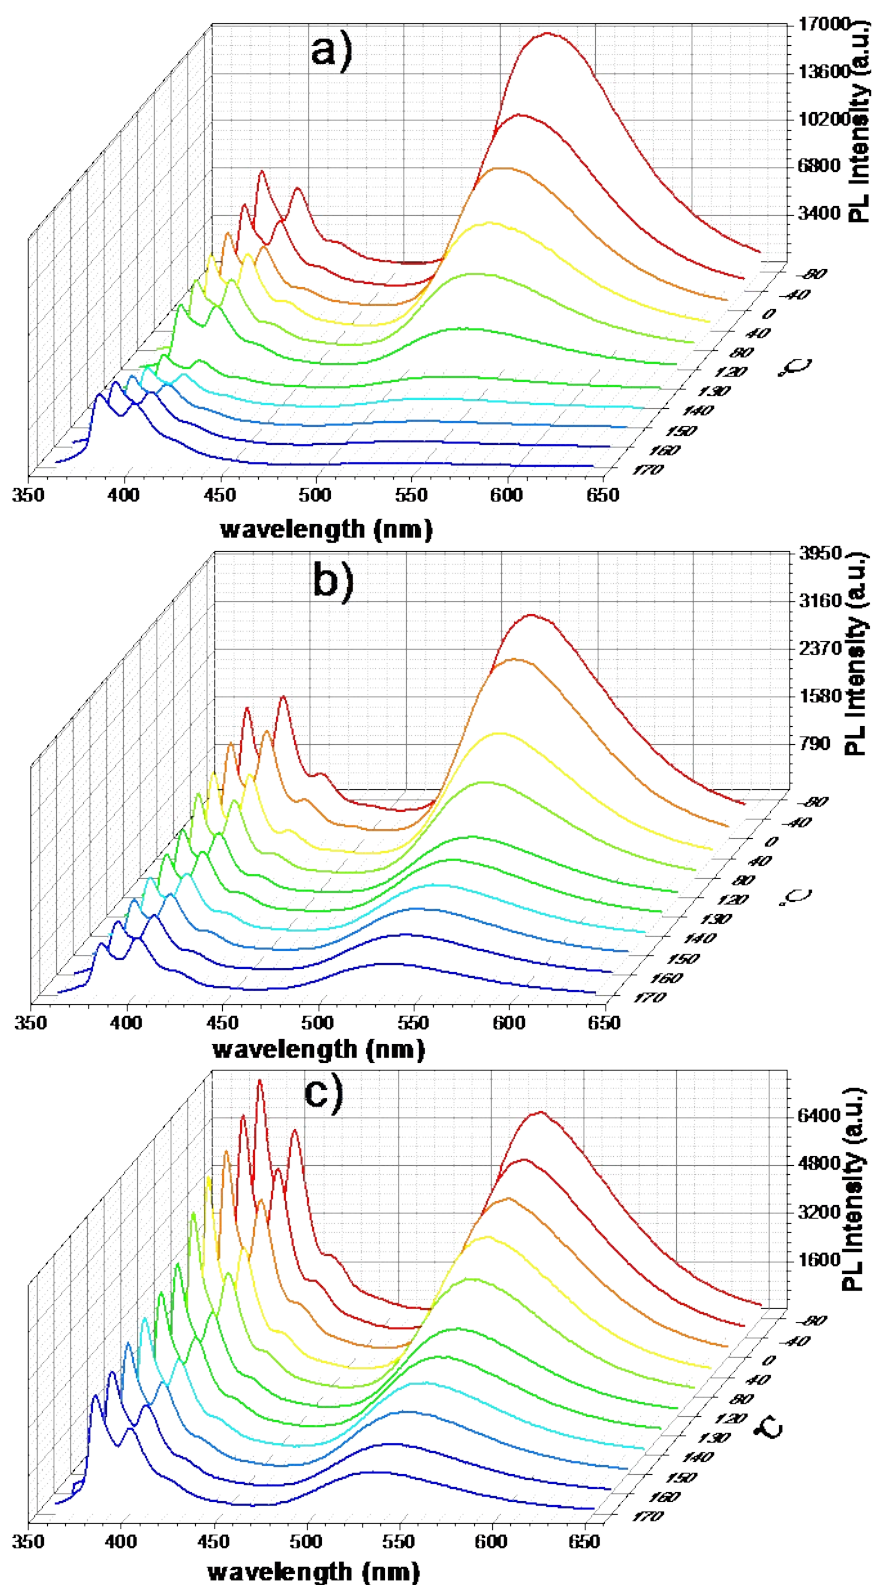

**Figure S5.** Temperature-dependent emission spectra of the C3-HBTPy (a, wt%: wt%=1: 5), C2-HBTPhe (b, wt%: wt%=1: 6), C3-HBTPhe (c, wt%: wt%=1: 5) film recorded between -80 and 170 °C (excitation wavelength: 350 nm).

## 6. Chang of Ib/Iy and CIE chromaticity with temperature

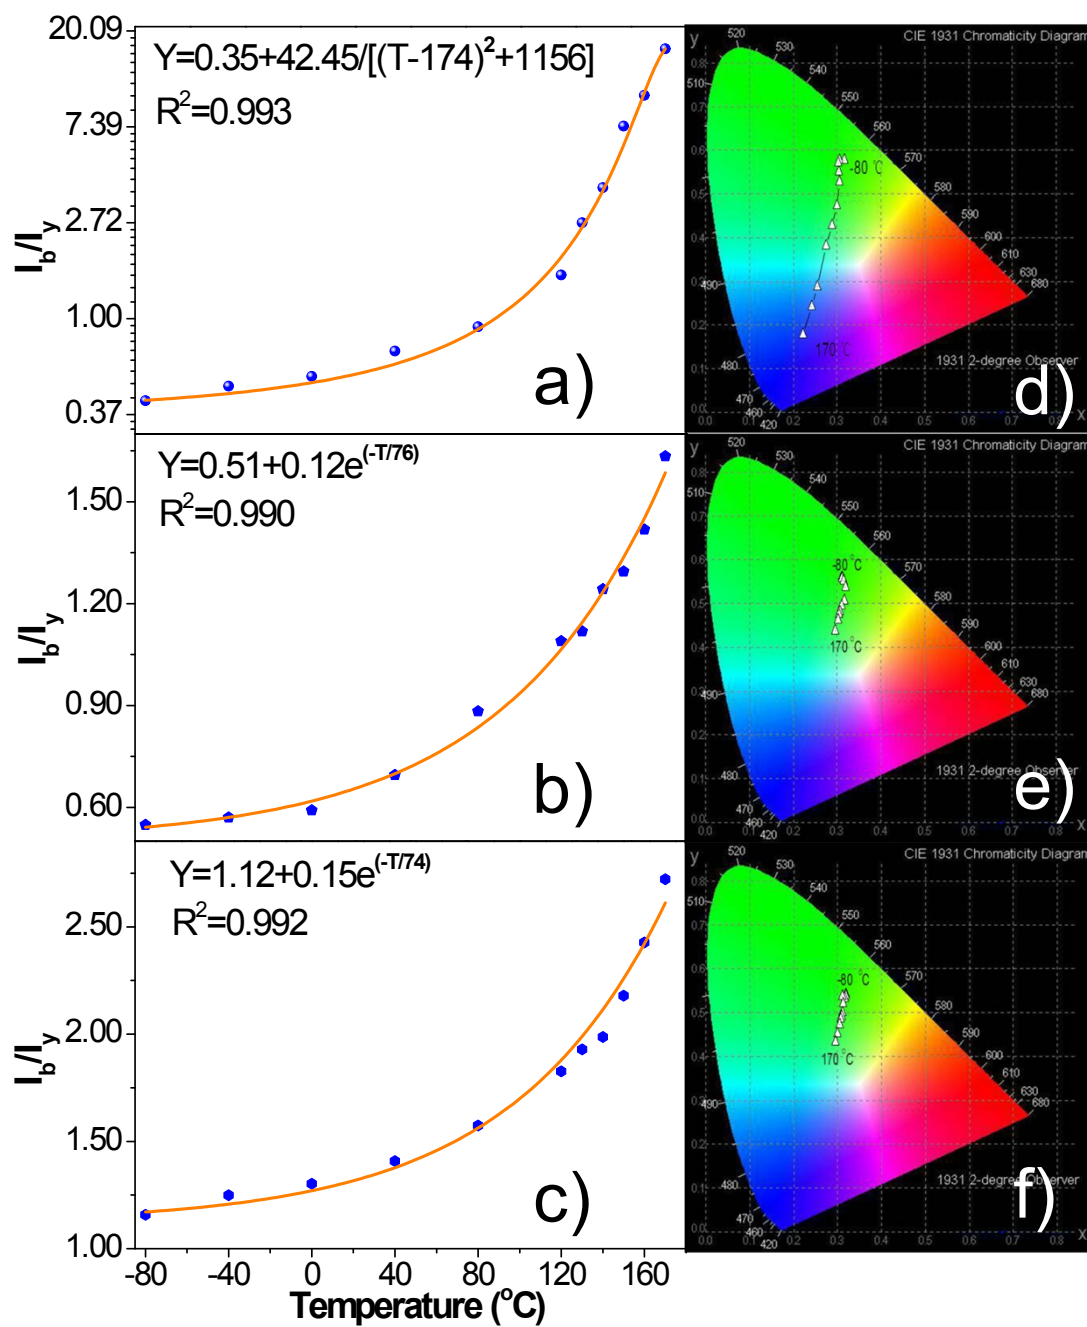

**Figure S6.** Temperature-dependent fluorescence intensity ratio ( $I_b/I_y$ ) and CIE coordinates of the a) C3-HBTPy (a, d), C2-HBTPhе (b, e) and C3-HBTPhе (c, f) hybrid films.
